# Supplementary material for: Encapsulation of cathode in lithium-sulfur batteries with a novel two-dimensional carbon allotrope: DHP-graphene
Source: PubMed Central journal article supplement (PMC5668302; doi:10.1038/s41598-017-15010-7), 2017-11-02
Supplement: 41598_2017_15010_MOESM1_ESM.pdf [file 41598_2017_15010_MOESM1_ESM.pdf]

## Supporting Information

# Encapsulation of cathode in lithium-sulfur batteries with a novel two-dimensional carbon allotrope: DHP-graphene

Yingxiang Cai<sup>a\*</sup>, Yuqing Guo<sup>a</sup>, Bo Jiang<sup>a</sup>, Yanan Lv<sup>a</sup>

\*Corresponding Author, E-mail: yingxiangcai@ncu.edu.cn

<sup>a</sup> Department of Physics, Nanchang University, Jiangxi, Nanchang 330031, P.R. China.

The following three figures show the crystal structures and phonon dispersions of HHPG-L, HHPG-Z and OHPG. Distinct imaginary frequencies show their dynamic instabilities.

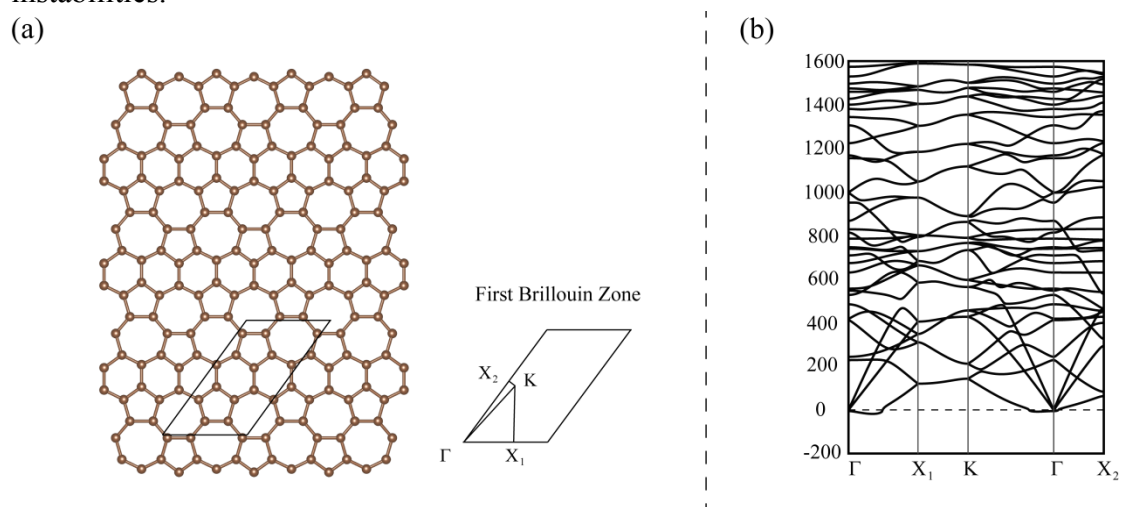

**Fig. S1.** (a) Two-dimensional crystal structure of HHPG-L and its first Brillouin Zone. (b) Phonon dispersion along the typical directions.

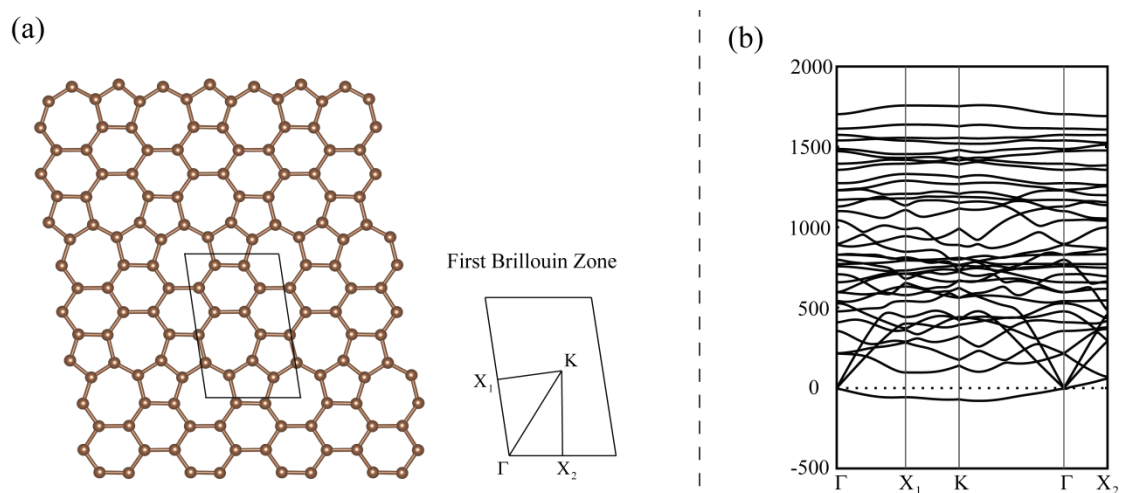

**Fig. S2.** (a) Two-dimensional crystal structure of HHPG-Z and its first Brillouin Zone. (b) Phonon dispersion along the typical directions.

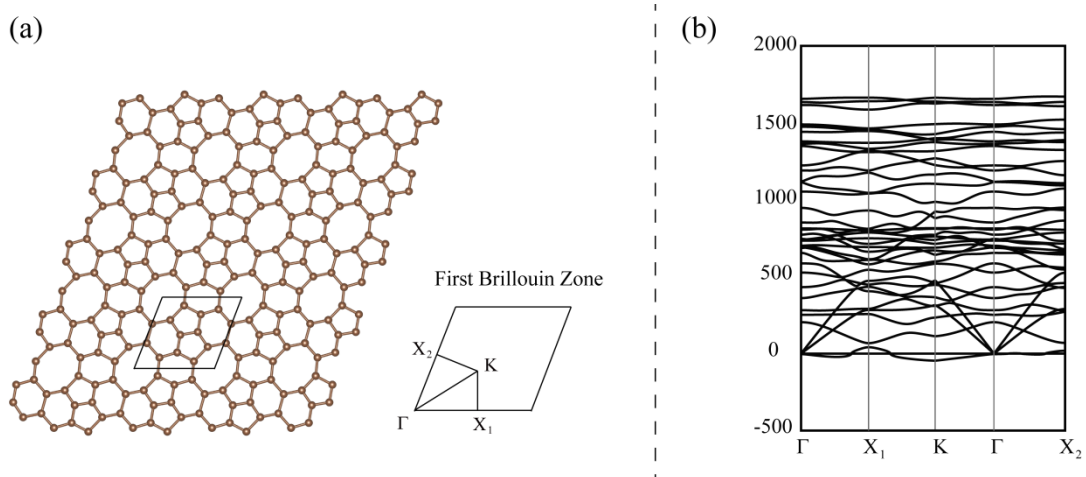

**Fig. S3.** (a) Two-dimensional crystal structure of OHPG and its first Brillouin Zone. (b) Phonon dispersion along the typical directions.
